# Supplementary material for: Highly efficient dye-sensitized solar cell with an electrostatic spray deposited upright-standing boron-doped ZnO (BZO) nanoporous nanosheet-based photoanode
Source: Royal Society of Chemistry journal article supplement (doi:10.1039/c3ta10587c), 2013-01-01
Supplement: c3ta10587c.pdf [file c3ta10587c.pdf]

## Supporting Information

### Highly efficient dye-sensitized solar cell with an electrostatic spray deposited upright-standing boron-doped ZnO (BZO) nanoporous nanosheet-based photoanode

Khalid Mahmood and Seung Bin Park\*

Department of Chemical & Biomolecular Engineering, Korea Advanced Institute of Science and Technology, 291 Daehak-ro, Yuseong-gu, Daejeon, 305-701, Republic of Korea

\*Corresponding author. Tel:+82-42-350-3298; Fax: +82-42-350-3910

E-mail address: [SeungBinPark@kaist.ac.kr](mailto:SeungBinPark@kaist.ac.kr)

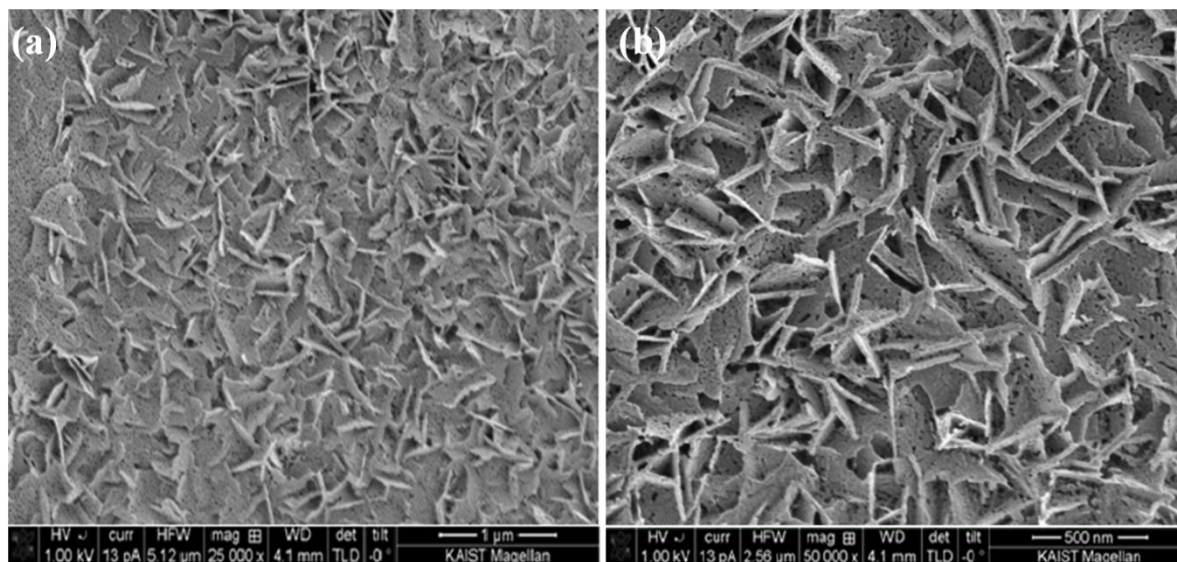

Figure S1. (a) FE-SEM image of as-prepared un-doped ZnO nanosheets (Sample 1), and (b) a magnified FE-SEM image of nanosheets (At synthesis temperature of 170 °C for sputtering time of 10 s after zero days).

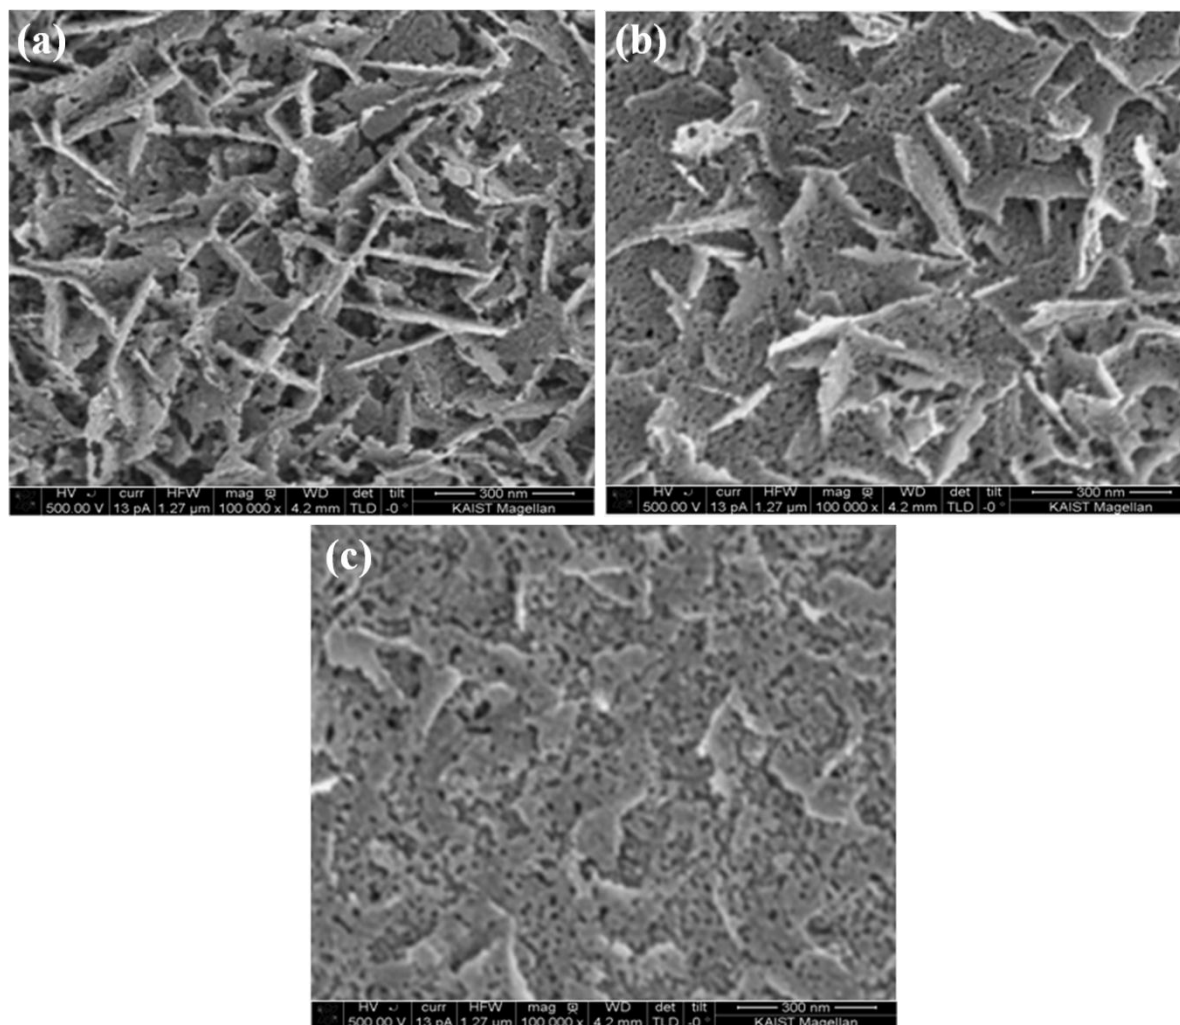

Figure S2. Magnified FE-SEM images showing the highly porous nature of BZO nanosheets films synthesized at different reaction temperatures: (a) 180 °C (sample 2); (b) 190 °C (sample 3), and (c) 200 °C (sample 4).

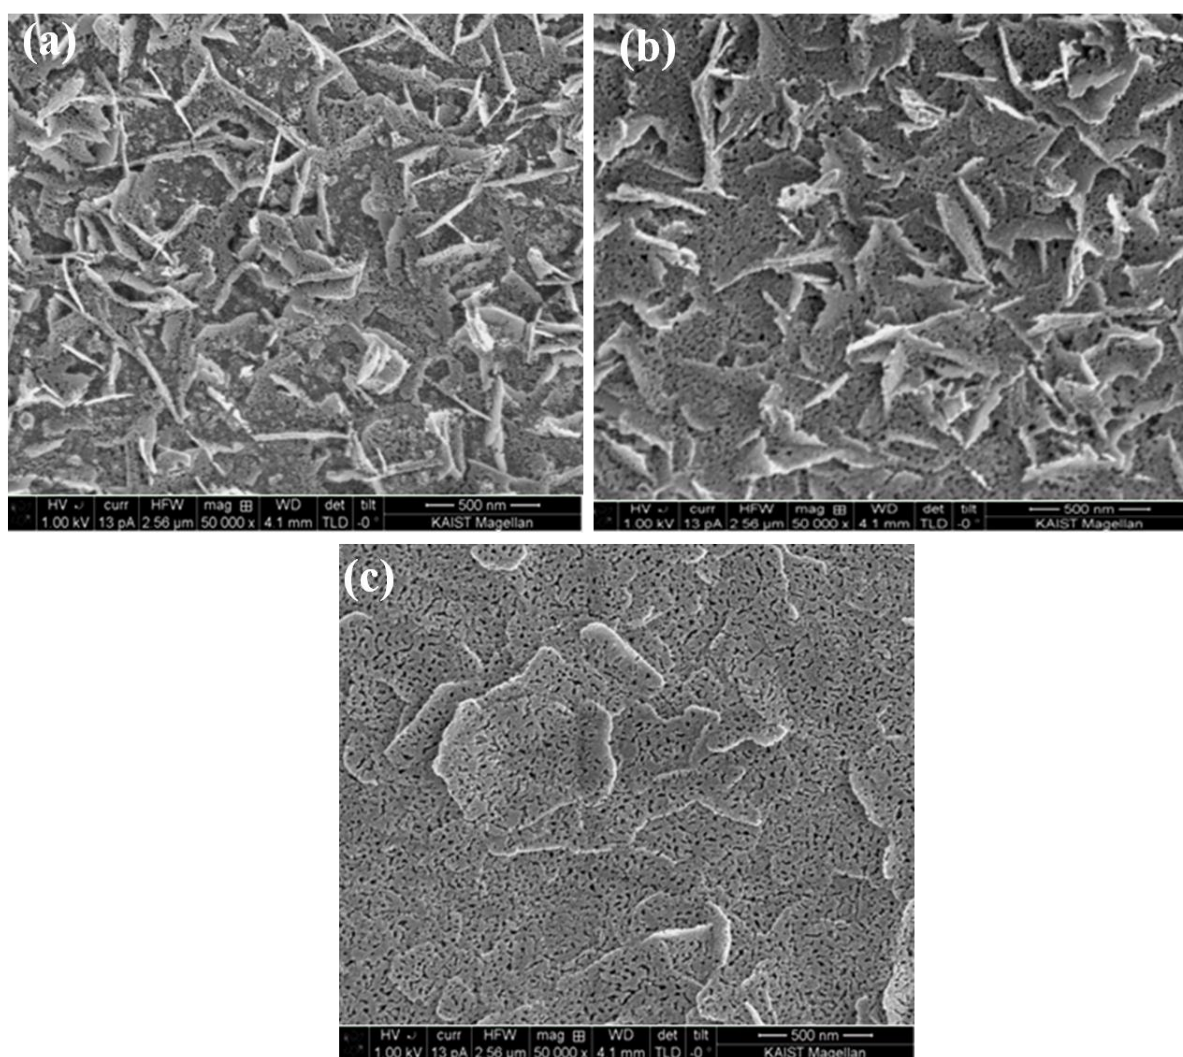

Figure S3. FE-SEM images showing the morphology evolution of un-doped ZnO nanosheets films synthesized at different reaction temperatures: (a) 180 °C (sample 6); (b) 190 °C (sample 7), and (c) 200 °C (sample 8).
